# Supplementary material for: Bortezomib plus dexamethasone vs thalidomide plus dexamethasone for relapsed or refractory multiple myeloma
Source: PubMed Central journal article supplement — Cancer Sci. 2018 Apr 17;109(5):1552–61. doi: 10.1111/cas.13550 (PMC5980148; doi:10.1111/cas.13550), 2018-04-17

**Fig. S1** Progression-free survival (A) and overall survival (B) of all randomized patients from the time of enrollment

**A**

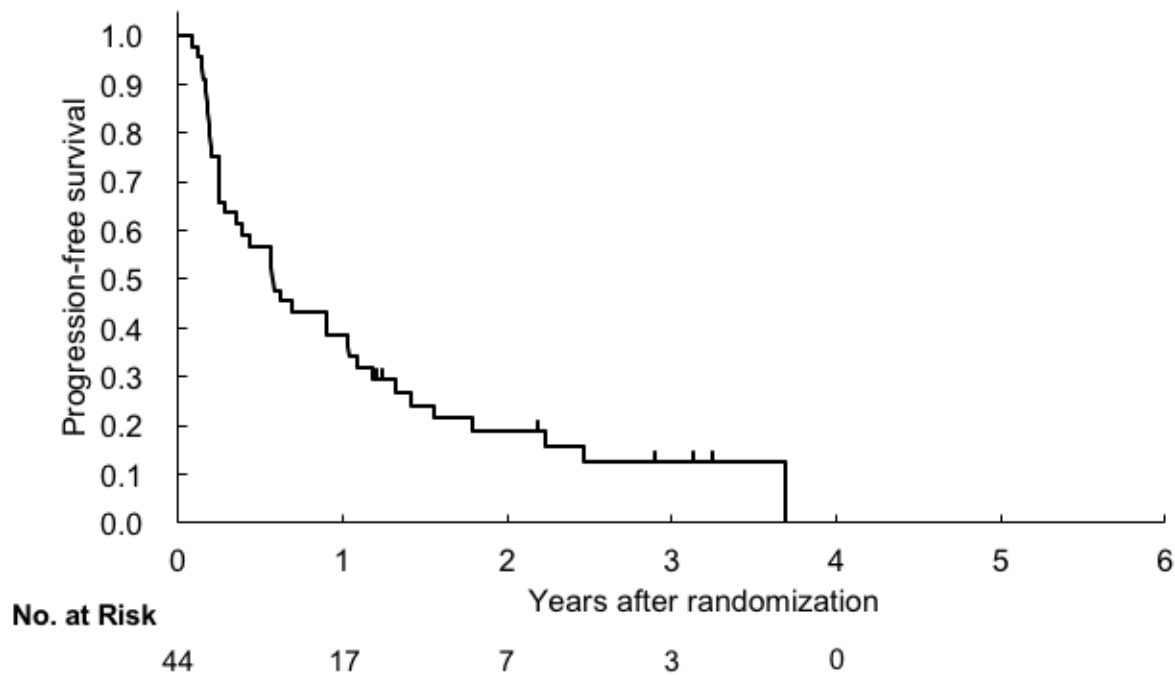

**Fig. S1** Progression-free survival (A) and overall survival (B) of all randomized patients from the time of enrollment

**B**

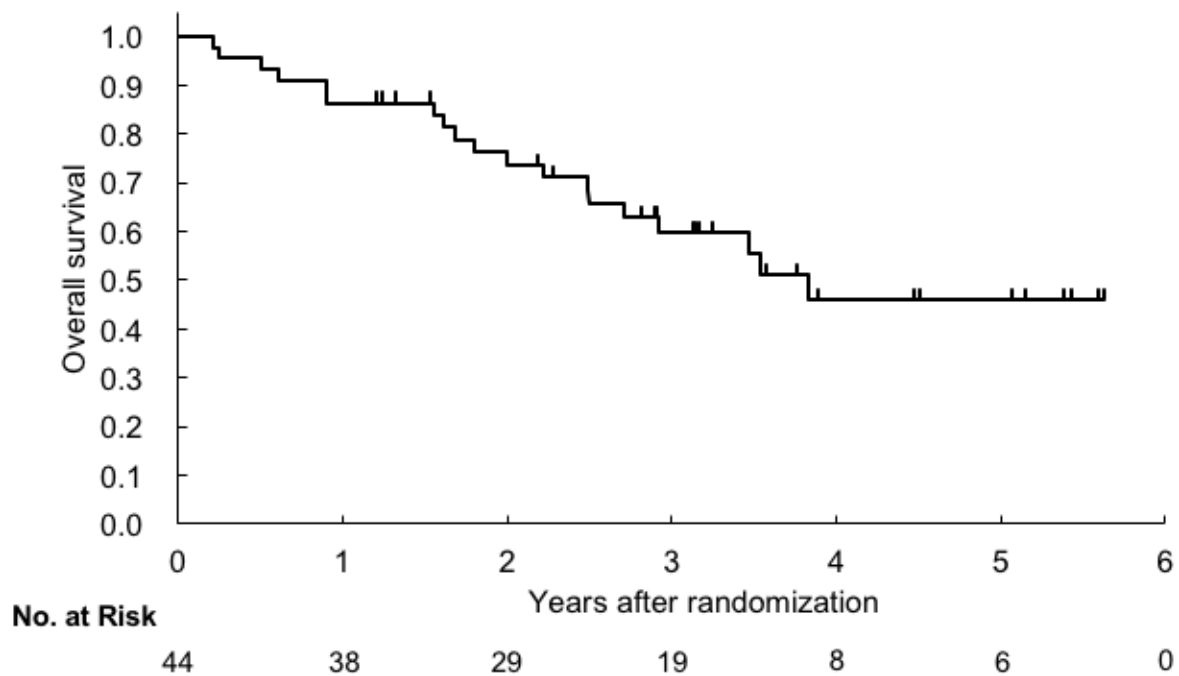

Supplement: CAS-109-1552-s001.pdf [file CAS-109-1552-s001.pdf]
