# Supplementary material for: Bortezomib plus dexamethasone vs thalidomide plus dexamethasone for relapsed or refractory multiple myeloma
Source: PubMed Central journal article supplement — Cancer Sci. 2018 Apr 17;109(5):1552–61. doi: 10.1111/cas.13550 (PMC5980148; doi:10.1111/cas.13550), 2018-04-17

**Fig. S2** Progression-free survival of the patients who received BD regimen (A) or TD regimen (B) based on the presence or absence of *FGFR3* or *c-MAF* mRNA expression which is the hallmark of high-risk group

## A. BD therapy arm

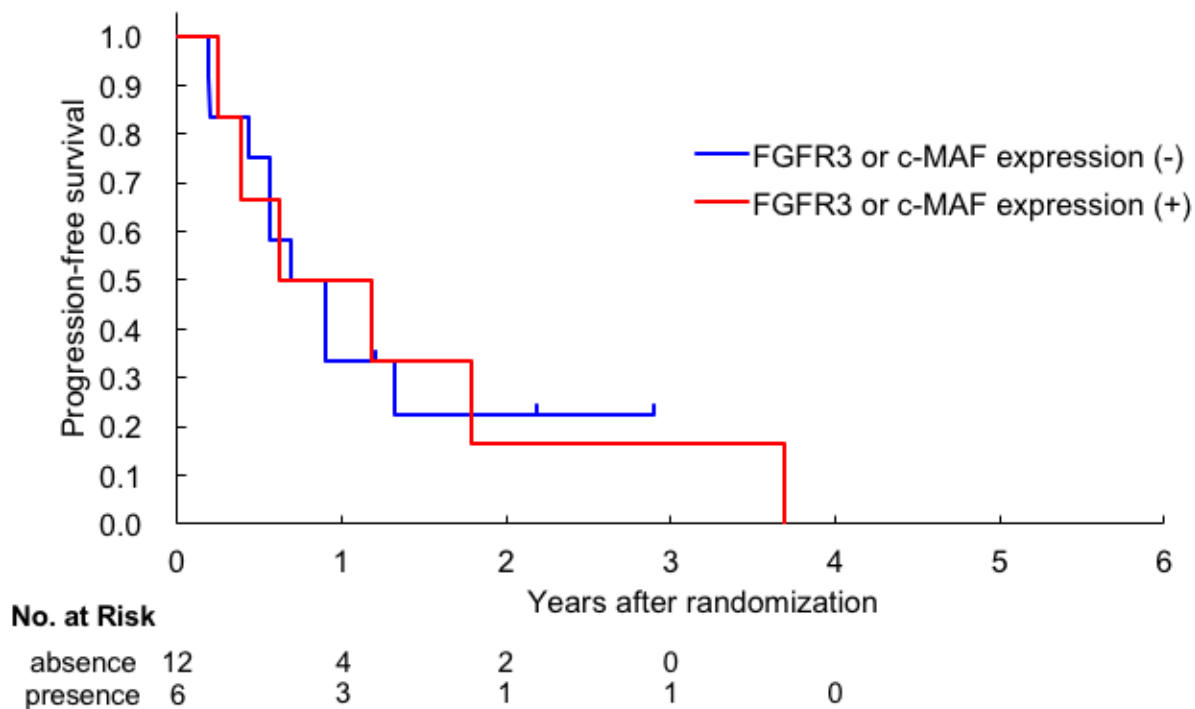

**Fig. S2** Progression-free survival of the patients who received BD regimen (A) or TD regimen (B) based on the presence or absence of *FGFR3* or *c-MAF* mRNA expression which is the hallmark of high-risk group

## B. TD therapy arm

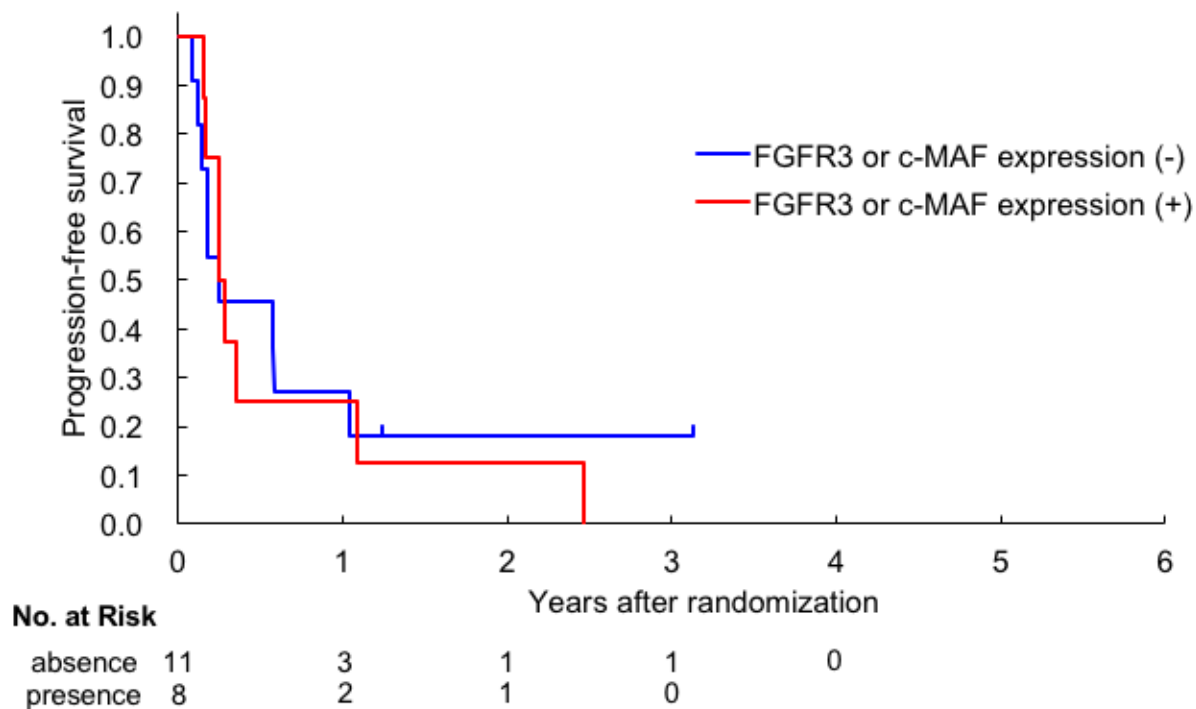

Supplement: CAS-109-1552-s002.pdf [file CAS-109-1552-s002.pdf]
