# Supplementary material for: Bortezomib plus dexamethasone vs thalidomide plus dexamethasone for relapsed or refractory multiple myeloma
Source: PubMed Central journal article supplement — Cancer Sci. 2018 Apr 17;109(5):1552–61. doi: 10.1111/cas.13550 (PMC5980148; doi:10.1111/cas.13550), 2018-04-17

Fig. S3 Progression-free survival of the patients of less than 65 years old (A) or those of 65 years old or over (B)

A. Patients < 65 years old

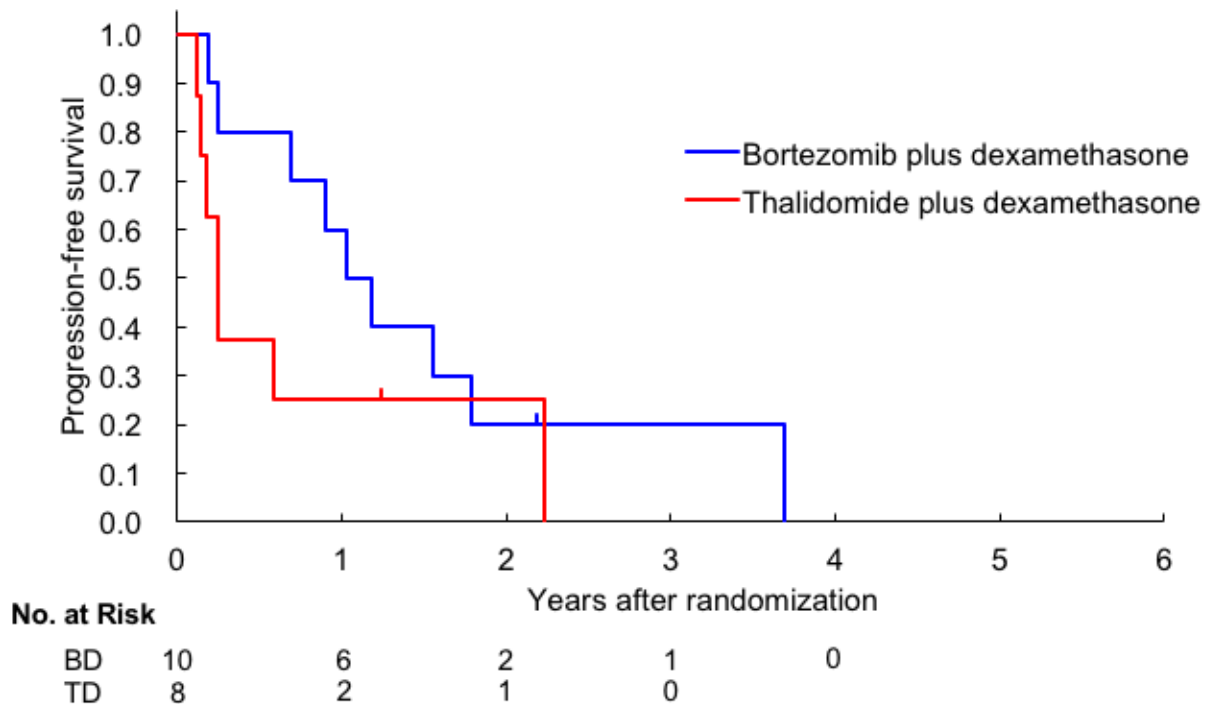

Fig. S3 Progression-free survival of the patients of less than 65 years old (A) or those of 65 years old or over (B)

B. Patients  $\geq 65$ -years old

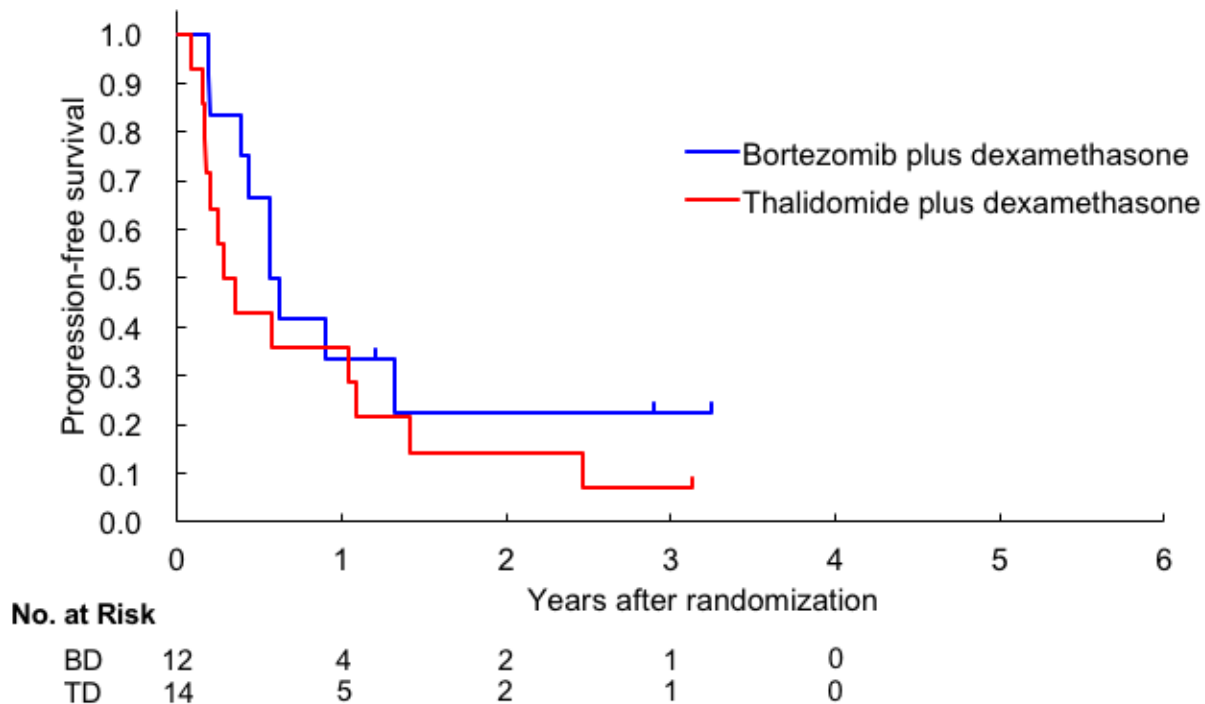

Supplement: CAS-109-1552-s003.pdf [file CAS-109-1552-s003.pdf]
